# Supplementary material for: Rapid detection of free and bound toxins using molecularly imprinted silica/graphene oxide hybrids
Source: Royal Society of Chemistry journal article supplement (doi:10.1039/d1cc00572c), 2021-01-01
Supplement: d1cc00572c4.pdf [file d1cc00572c4.pdf]

[REDACTED]
